# Supplementary material for: IGF-1 Haploinsufficiency Causes Age-Related Chronic Cochlear Inflammation and Increases Noise-Induced Hearing Loss
Source: MDPI journal article supplement (doi:10.3390/cells10071686), 2021-07-03
Supplement: s1 [file s1]

## Supplementary Materials

**Table S1.** List of antibodies used in this study. IHF: Immunohistofluorescence, WB: Western Blotting.

| Antibody                                     | Manufacturer   | Catalog Number | Species | Monoclonal or polyclonal | Use | Dilution |
|----------------------------------------------|----------------|----------------|---------|--------------------------|-----|----------|
| Synaptophysin                                | DAKO           | A 0010         | Rabbit  | Pc                       | IHF | 1:100    |
| Neurofilament 200 KDa                        | Millipore      | CBL212         | Mouse   | Mc                       | IHF | 1:100    |
| IBA1                                         | Abcam          | ab5076         | Goat    | Pc                       | IHF | 1:100    |
| Phospho p38 (Thr180/Tyr182)                  | Cell Signaling | 9211           | Rabbit  | Pc                       | WB  | 1:1000   |
| Phospho AKT (Ser473)                         | Cell Signaling | 9271           | Rabbit  | Pc                       | WB  | 1:1000   |
| Phospho-p44/42 MAPK (ERK1/2) (Thr202/Tyr204) | Cell Signaling | 9101           | Rabbit  | Pc                       | WB  | 1:1000   |
| Phospho-SAPK/JNK (Thr183/Tyr185)             | Cell Signaling | 4668           | Rabbit  | Pc                       | WB  | 1:1000   |
| PI3K                                         | In-house       | -              | Rabbit  | Pc                       | WB  | 1:10000  |
| p38 $\alpha$                                 | Santa Cruz     | sc-535         | Rabbit  | Pc                       | WB  | 1:4000   |
| AKT1/2                                       | Santa Cruz     | sc-1619        | Goat    | Pc                       | WB  | 1:1000   |
| p44/42 MAPK (ERK1/2)                         | Cell Signaling | 9102           | Rabbit  | Pc                       | WB  | 1:1000   |
| SAPK/JNK                                     | Cell Signaling | 9252           | Rabbit  | Pc                       | WB  | 1:1000   |

**A**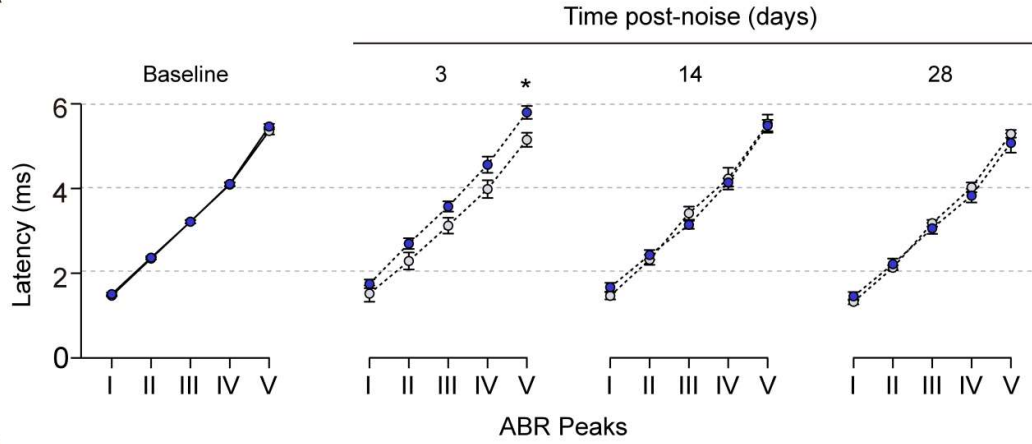**B**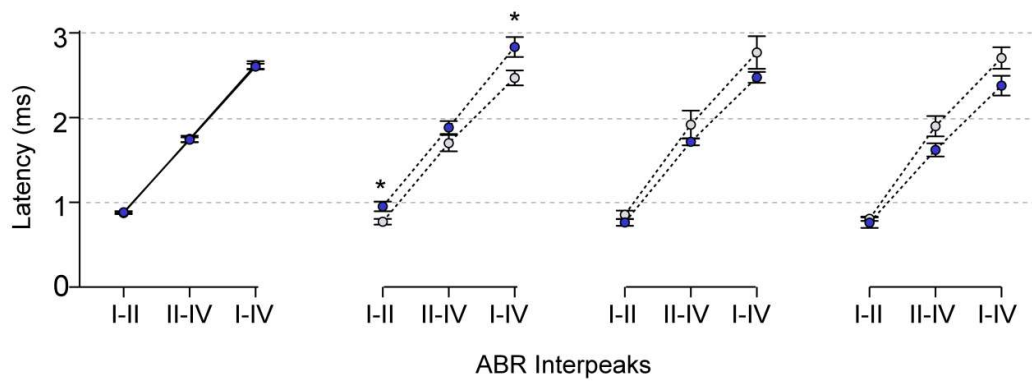

**Figure S1.** ABR latencies. ABR peaks I to V latencies (A) and interpeak latencies (B) (mean  $\pm$  SEM) after click stimulation in *Igf1*<sup>+/+</sup> (n=9) and WT (n=7) mice before and 3, 14 and 28 days after noise exposure. Statistically significant differences were evaluated by Student's t-test (\*p<0.05 between genotypes).
